# Supplementary material for: Mastery learning improves students skills in inserting intravenous access: a pre-post-study
Source: PubMed Central journal article supplement (PMC5003138; doi:10.3205/zma001055), 2016-08-15
Supplement: JME-33-56-s-001.pdf [file JME-33-56-s-001.pdf]

## Supplemental Digital Table 2

### Subgroup Analyses of Studies Comparing Simulation-Based Mastery Learning with No Intervention \*

Table 2.1. Subgroup Analyses for Outcome: Time Skill

| Feature                 | Subgroup              | No. studies (No. participants) | ES   | 95% confidence interval | <i>P</i> <sub>interaction</sub> |
|-------------------------|-----------------------|--------------------------------|------|-------------------------|---------------------------------|
| All                     |                       | 15 (278)                       | 0.94 | 0.64, 1.24              |                                 |
| No. groups, timing      | 2-group posttest-only | 3 (52)                         | 1.18 | 0.58, 1.79              |                                 |
|                         | 2-group pre-post      | 6 (151)                        | 0.76 | 0.3, 1.22               |                                 |
|                         | 1-group pre-post      | 6 (75)                         | 1.09 | 0.64, 1.54              |                                 |
| Group allocation        | Randomized            | 8 (171)                        | 0.68 | 0.36, 1.01              | 0.004                           |
|                         | Nonrandomized         | 1 (32)                         | 1.62 | 1.07, 2.17              |                                 |
| Participants            | Medical student       | 6 (109)                        | 1.2  | 0.44, 1.95              |                                 |
|                         | Postgraduate trainees | 11 (212)                       | 1.03 | 0.71, 1.35              |                                 |
|                         | Practicing physicians | 1 (18)                         | 1.37 | 0.65, 2.08              |                                 |
|                         | Other                 | 1 (14)                         | 1.79 | 0.45, 3.12              |                                 |
| Cognitive interactivity | High                  | 13 (258)                       | 0.9  | 0.6, 1.2                | 0.52                            |
|                         | Low                   | 2 (20)                         | 1.59 | -0.51, 3.69             |                                 |
| Feedback                | High                  | 2 (25)                         | 0.98 | 0.43, 1.53              | 0.9                             |
|                         | Low                   | 13 (253)                       | 0.94 | 0.61, 1.27              |                                 |
| Repetitions             | Many >10              | 12 (225)                       | 0.81 | 0.51, 1.1               | 0.01                            |
|                         | Few ≤9                | 3 (53)                         | 1.56 | 1.09, 2.03              |                                 |
| Time learning           | ≥5 hours              | 5 (129)                        | 1.11 | 0.56, 1.67              | 0.64                            |
|                         | <5 hours              | 9 (130)                        | 0.96 | 0.65, 1.27              |                                 |
| Assessment              | Blinded               | 12 (221)                       | 1.05 | 0.73, 1.37              | 0.28                            |
|                         | Not blinded           | 3 (57)                         | 0.61 | -0.13, 1.34             |                                 |
| NOS                     | High ≥4               | 6 (144)                        | 0.56 | 0.26, 0.86              | 0.003                           |
|                         | Low <4                | 9 (134)                        | 1.25 | 0.89, 1.6               |                                 |
| MERSQI                  | High ≥12              | 12 (240)                       | 1.03 | 0.65, 1.4               | 0.36                            |
|                         | Low <12               | 3 (38)                         | 0.77 | 0.36, 1.18              |                                 |
| Effect size estimation  | Precise               | 13 (245)                       | 0.94 | 0.6, 1.28               |                                 |
